# Supplementary material for: The Effect of Elevated Curing Temperatures on High Ye’elimite Calcium Sulfoaluminate Cement Mortars
Source: PubMed Central journal article supplement (PMC6480238; doi:10.3390/ma12071072), 2019-04-01
Supplement: materials-12-01072-s001.pdf [file materials-12-01072-s001.pdf]

# Supplementary Materials: The Effect of Elevated Curing Temperatures on High Ye'elite Calcium Sulfoaluminate Cement Mortars

Yeonung Jeong, Craig W. Hargis, Hyunuk Kang, Sung-Chul Chun and Juhyuk Moon

Table 1. Averaged compressive strength and its standard deviation.

| Sample label | Curing Age (days) | Compressive Strength (MPa) |                    |
|--------------|-------------------|----------------------------|--------------------|
|              |                   | Averaged Value             | Standard Deviation |
| CSA1-90      | 1                 | 22.20                      | 1.94               |
|              | 28                | 57.73                      | 2.73               |
| CSA2-90      | 1                 | 25.93                      | 2.82               |
|              | 28                | 23.91                      | 2.91               |
| CSA1-60      | 1                 | 53.20                      | 2.04               |
|              | 28                | 58.33                      | 0.93               |
| CSA2-60      | 1                 | 18.61                      | 5.69               |
|              | 28                | 18.29                      | 1.62               |
| CSA1-30      | 1                 | 54.72                      | 1.22               |
|              | 28                | 80.39                      | 0.87               |
| CSA2-30      | 1                 | 9.78                       | 3.18               |
|              | 28                | 40.97                      | 2.11               |

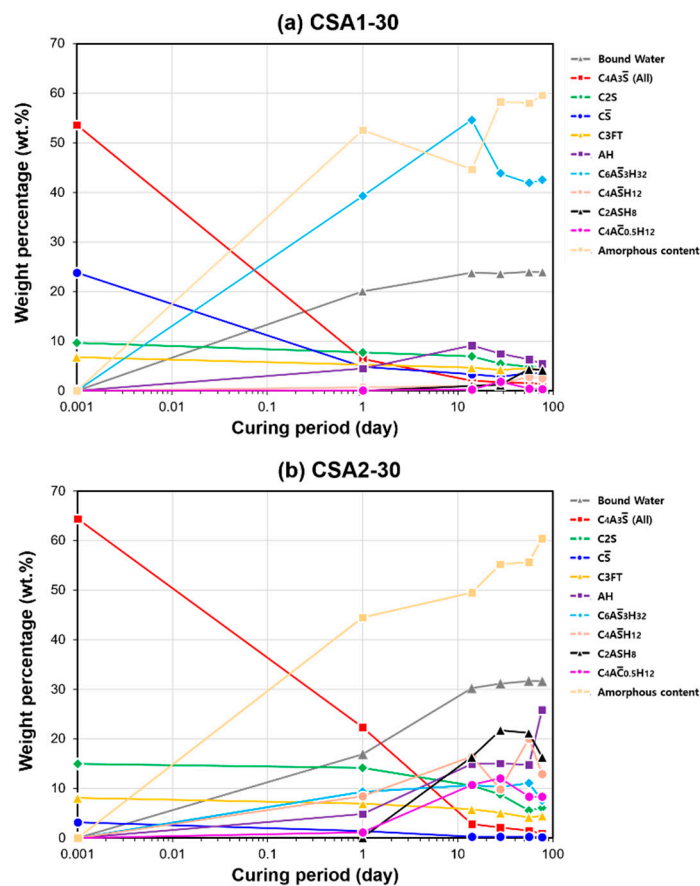

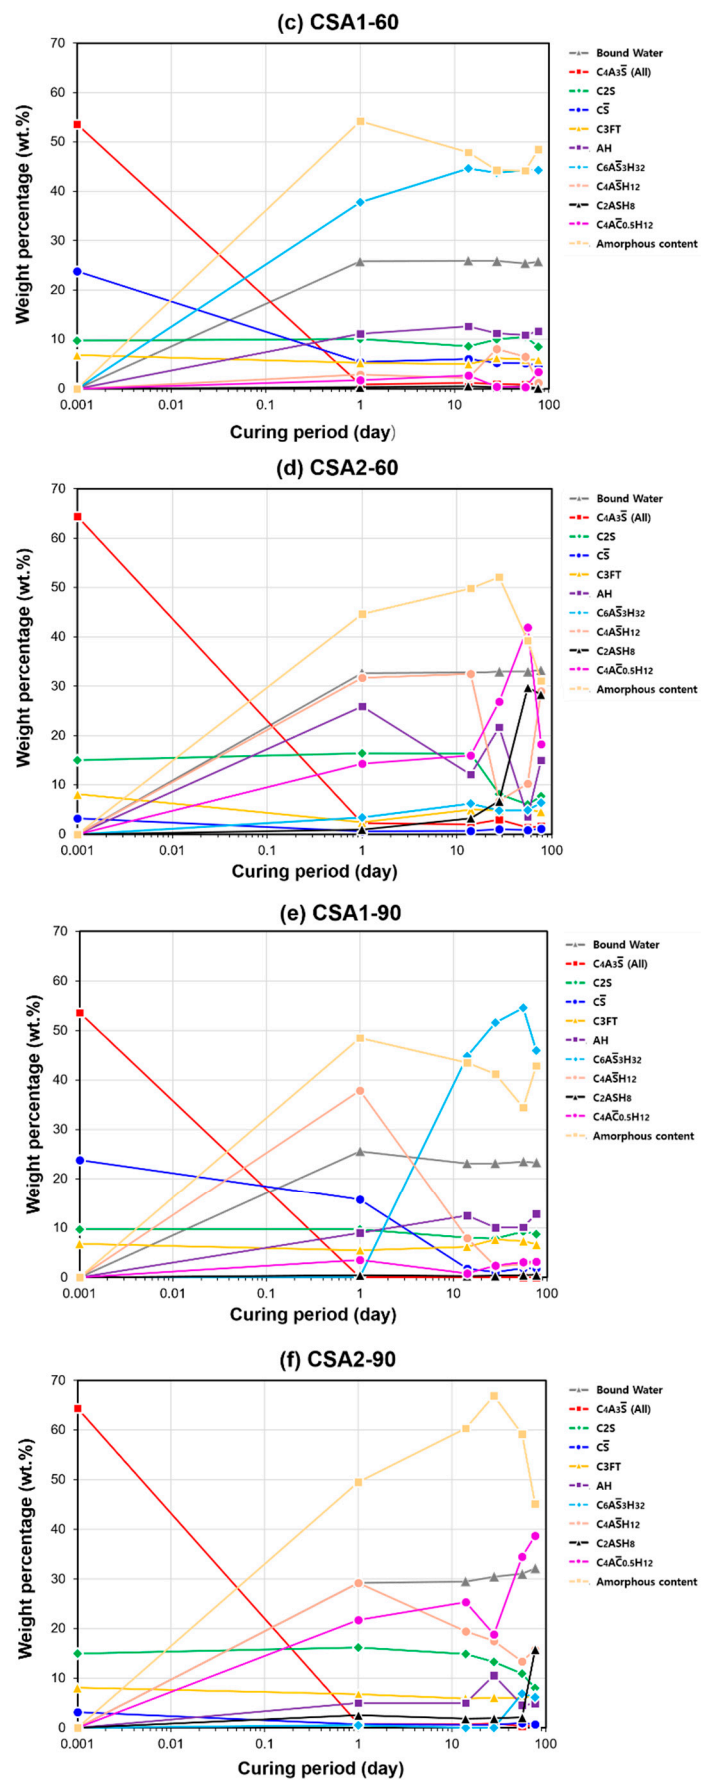

Figure S1. XQRD results for (a) CSA1-30, (b) CSA2-30, (c) CSA1-60, (d) CSA2-60, (e) CSA1-90, and (f) CSA2-90.

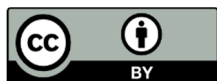

© 2019 by the authors. Submitted for possible open access publication under the terms and conditions of the Creative Commons Attribution (CC BY) license (<http://creativecommons.org/licenses/by/4.0/>).
